# Supplementary material for: Recovery of Lignins with Potent Antioxidant Properties from Shells of Edible Nuts by a Green Ball Milling/Deep Eutectic Solvent (DES)-Based Protocol
Source: MDPI journal article supplement (doi:10.3390/antiox11101860), 2022-09-21
Supplement: s1 [file s1]

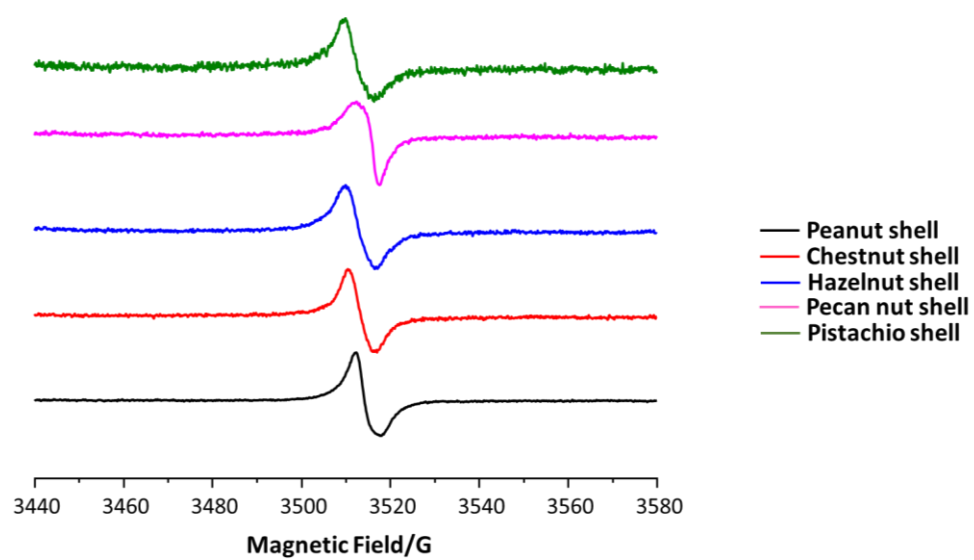

**Figure S1.** Solid state EPR spectra of starting nut shells.



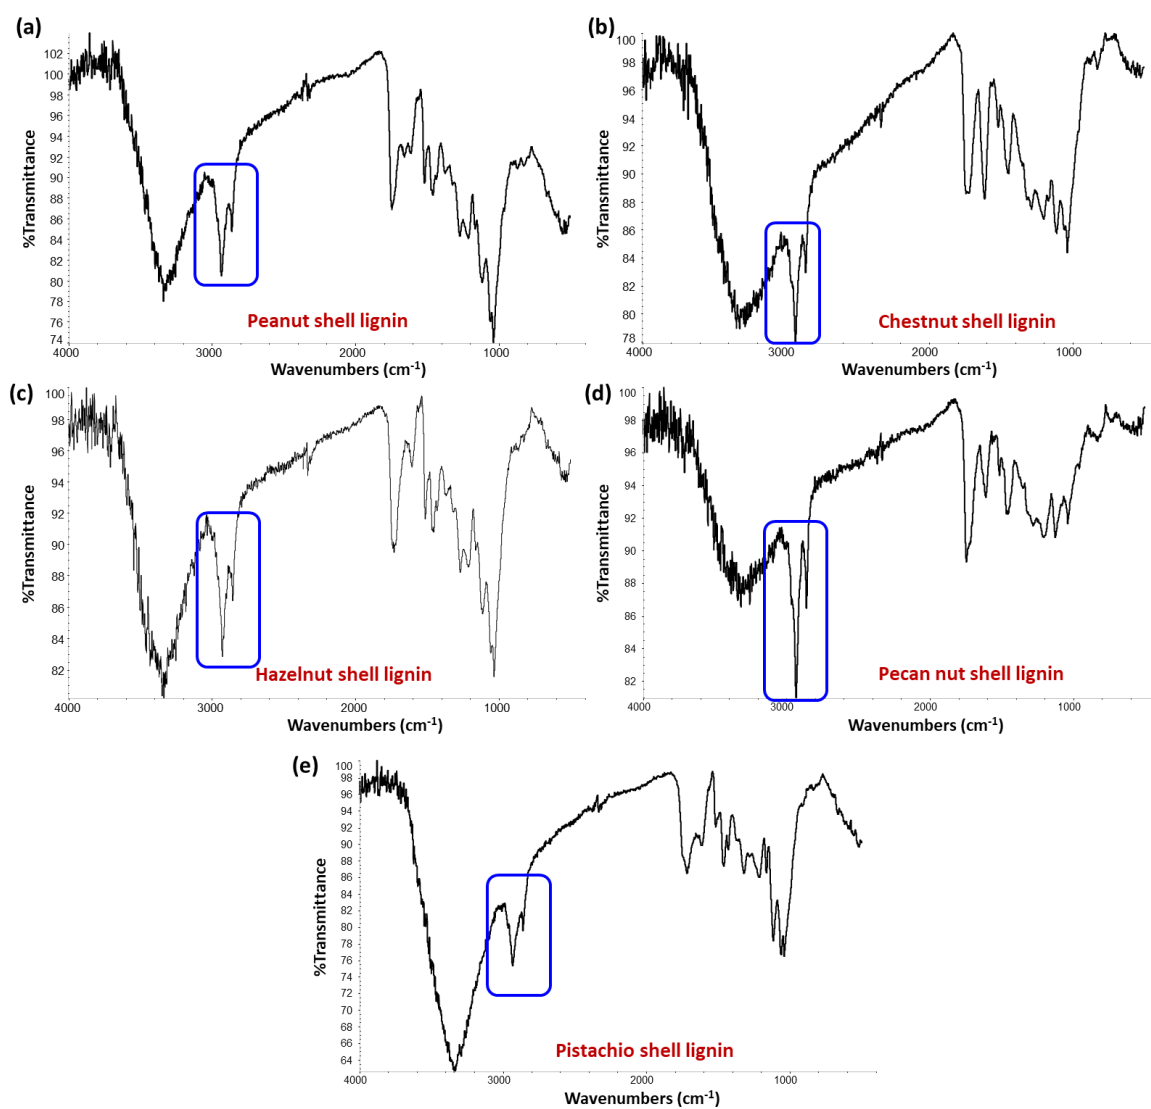

**Figure S2.** ATR-FTIR spectra of (a) peanut, (b) chestnut, (c) hazelnut, (d) pecan nut and (e) pistachio shell lignins. Highlighted are the bands associated to the aromatic C-H bond stretching vibration of lignins.



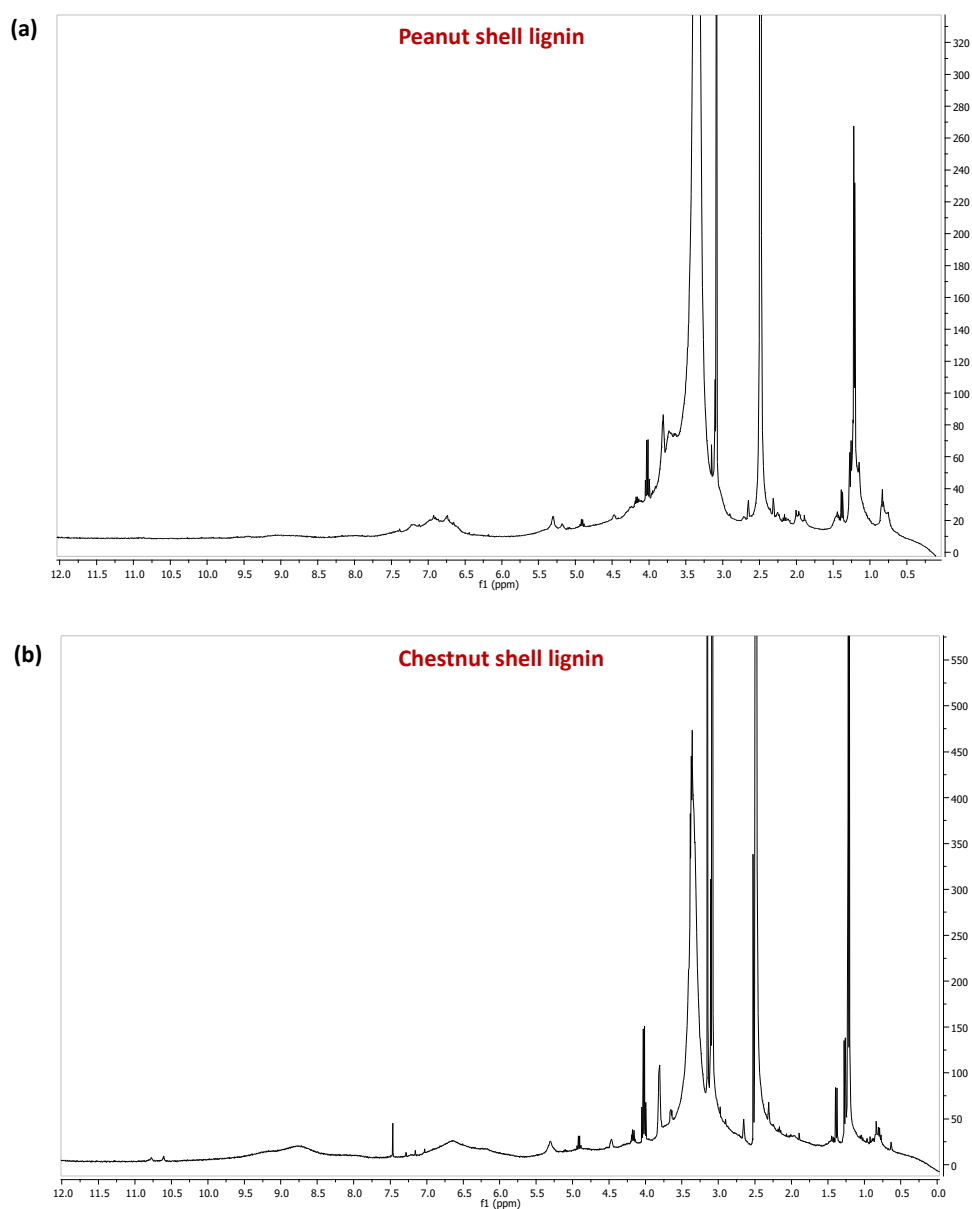

**Figure S3.**  $^1\text{H}$  NMR spectra ( $\text{DMSO}-d_6$ ) of (a) peanut and (b) chestnut shell lignins.



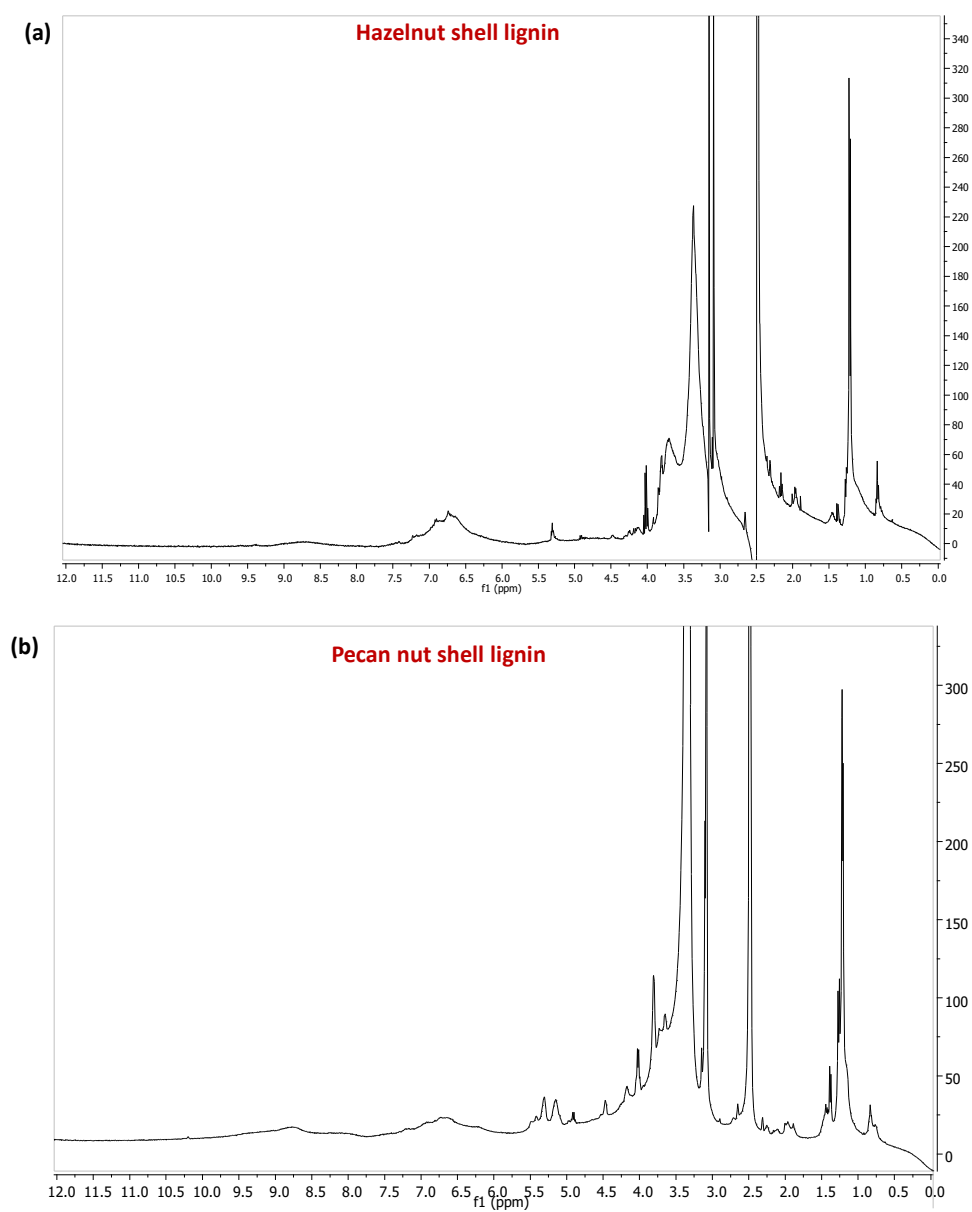

**Figure S4.**  $^1\text{H}$  NMR spectra ( $\text{DMSO}-d_6$ ) of (a) hazelnut and (b) pecan nut shell lignins.



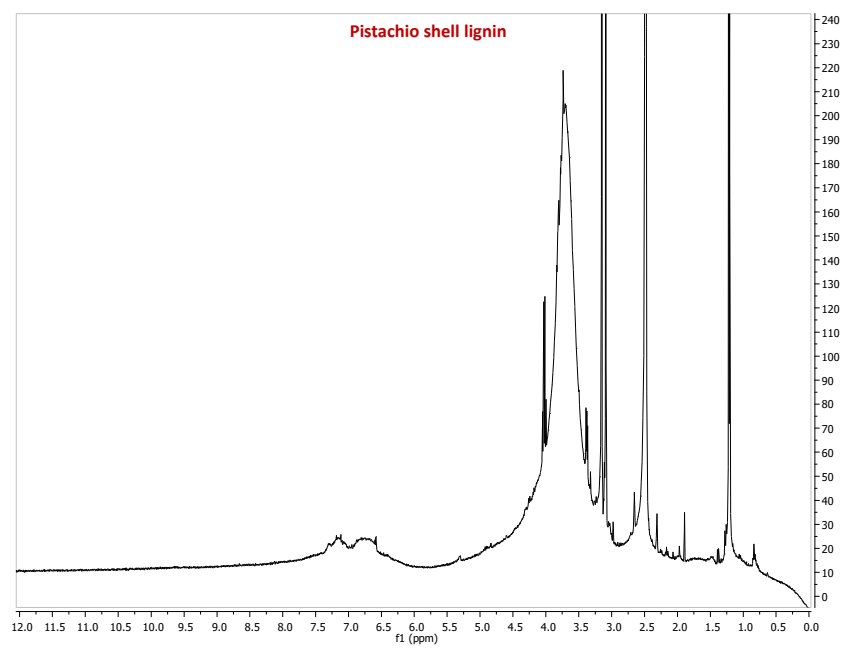

**Figure S5.**  $^1\text{H}$  NMR spectrum ( $\text{DMSO}-d_6$ ) of pistachio shell lignin.



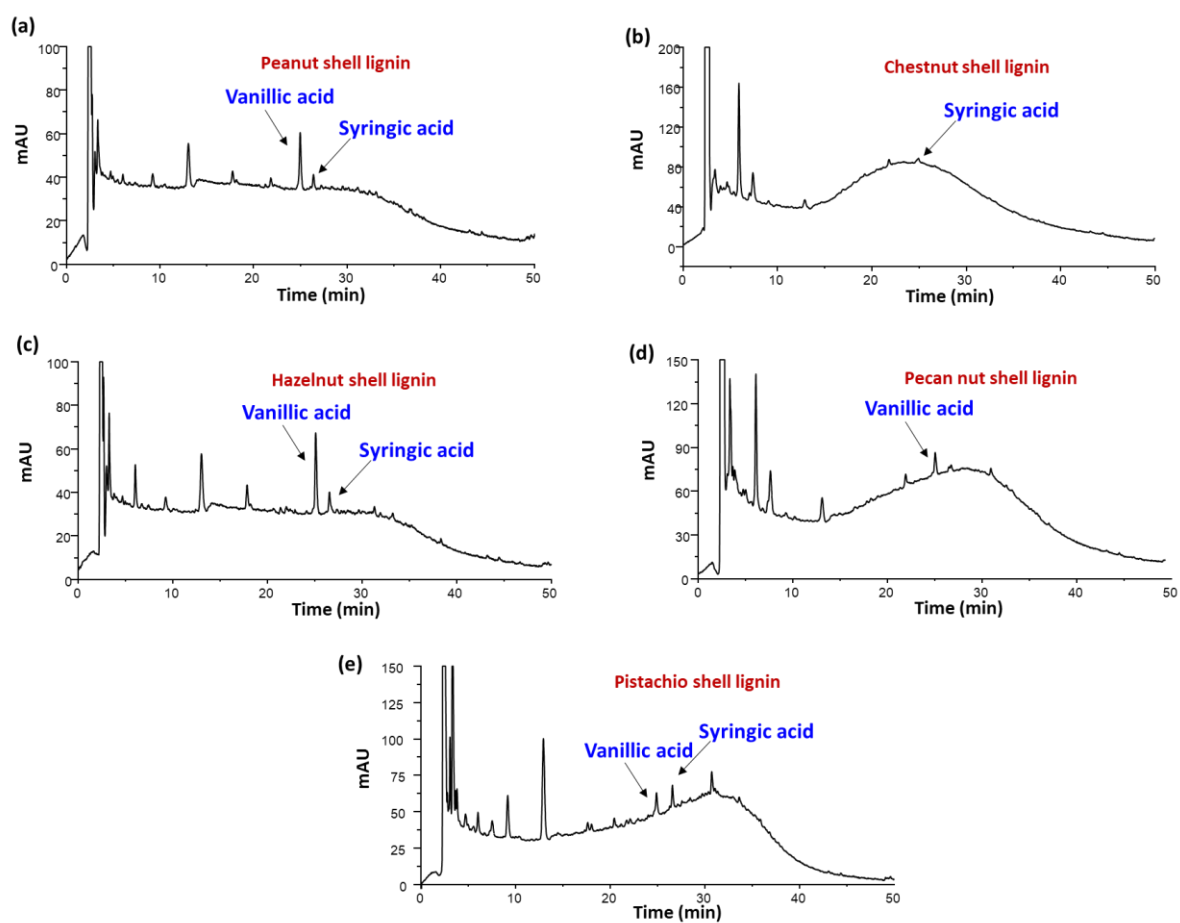

**Figure S6.** HPLC profiles of the alkaline hydrogen peroxide degradation mixtures of (a) peanut, (b) chestnut, (c) hazelnut, (d) pecan nut, and (e) pistachio shell lignins.
